# Supplementary material for: A process-based evaluation of biases in extratropical stratosphere-troposphere coupling in subseasonal forecast systems
Source: Copernicus journal article supplement (doi:10.5194/egusphere-2024-1762), 2024-06-27
Supplement: Supplementary file 1 [file egusphere-2024-1762-supplement.pdf]

# Supplement to: A process-based evaluation of biases in extratropical stratosphere-troposphere coupling in subseasonal forecast systems

Zachary D. Lawrence<sup>1,2</sup>, Chaim I. Garfinkel<sup>3</sup>, Amy H. Butler<sup>4</sup>, Etienne Dunn-Sigouin<sup>5</sup>, Irina Statnaia<sup>6</sup>, Alexey Yu. Karpechko<sup>6</sup>, Gerbrand Koren<sup>7</sup>, Marta Abalos<sup>8</sup>, Blanca Ayarzagüena<sup>8</sup>, David Barriopedro<sup>17</sup>, Natalia Calvo<sup>8</sup>, Alvaro de la Cámara<sup>8</sup>, Andrew Charlton-Perez<sup>9</sup>, Daniela I.V. Domeisen<sup>10,11</sup>, Javier García-Serrano<sup>12</sup>, Neil P. Hindley<sup>13</sup>, Martin Jucker<sup>14</sup>, Hera Kim<sup>15</sup>, Simon H. Lee<sup>16</sup>, Marisol Osman<sup>19,20</sup>, Froila M. Palmeiro<sup>12</sup>, Inna Polichtchouk<sup>21</sup>, Jian Rao<sup>22</sup>, Jadwiga H. Richter<sup>23</sup>, Chen Schwartz<sup>3</sup>, Seok-Woo Son<sup>15</sup>, Masakazu Taguchi<sup>24</sup>, Nicholas L. Tyrrell<sup>6</sup>, Corwin J. Wright<sup>13</sup>, and Rachel W.-Y. Wu<sup>11</sup>

<sup>1</sup>Cooperative Institute for Research in Environmental Sciences (CIRES), University of Colorado Boulder, Boulder, CO, USA

<sup>2</sup>NOAA Physical Sciences Laboratory (PSL), Boulder, CO, USA

<sup>3</sup>Fredy & Nadine Herrmann Institute of Earth Sciences, The Hebrew University of Jerusalem, Israel

<sup>4</sup>NOAA Chemical Sciences Laboratory (CSL), Boulder, CO, USA

<sup>5</sup>NORCE Norwegian Research Centre and Bjerknes Centre for Climate Research, Bergen, Norway

<sup>6</sup>Finnish Meteorological Institute, Meteorological Research, Helsinki, Finland

<sup>7</sup>Copernicus Institute of Sustainable Development, Utrecht University, Utrecht, The Netherlands

<sup>8</sup>Department of Earth Physics and Astrophysics, Universidad Complutense de Madrid, Madrid, Spain

<sup>9</sup>Department of Meteorology, University of Reading, Reading, UK

<sup>10</sup>University of Lausanne, Lausanne, Switzerland

<sup>11</sup>ETH Zurich, Zurich, Switzerland

<sup>12</sup>Group of Meteorology, Universitat de Barcelona (UB), Barcelona, Spain

<sup>13</sup>Centre for Climate Adaptation and Environment Research, University of Bath, Bath, UK

<sup>14</sup>Climate Change Research Centre and ARC Centre of Excellence for Climate Extremes, University of New South Wales, Sydney, Australia

<sup>15</sup>School of Earth and Environmental Sciences, Seoul National University, South Korea

<sup>17</sup>Instituto de Goeciencias (IGEO), Consejo Superior de Investigaciones Científicas – Universidad Complutense de Madrid (CSIC-UCM), Madrid, Spain.

<sup>19</sup>CONICET – Universidad de Buenos Aires, Centro de Investigaciones del Mar y la Atmósfera (CIMA), Buenos Aires, Argentina

<sup>20</sup>CNRS – IRD – CONICET – UBA. Instituto Franco-Argentino para el Estudio del Clima y sus Impactos (IRL 3351 IFAECI), Buenos Aires, Argentina

<sup>21</sup>European Centre for Medium-Range Weather Forecasts, Reading, UK

<sup>22</sup>Collaborative Innovation Center on Forecast and Evaluation of Meteorological Disasters / Key Laboratory of Meteorological Disaster of Ministry of Education, Nanjing University of Information Science and Technology, Nanjing, China

<sup>23</sup>Climate and Global Dynamics Laboratory, National Center for Atmospheric Research, Boulder, CO

<sup>24</sup>Department of Earth Science, Aichi University of Education, Kariya, Japan

**Correspondence:** Chaim I. Garfinkel (chaim.garfinkel@mail.huji.ac.il)

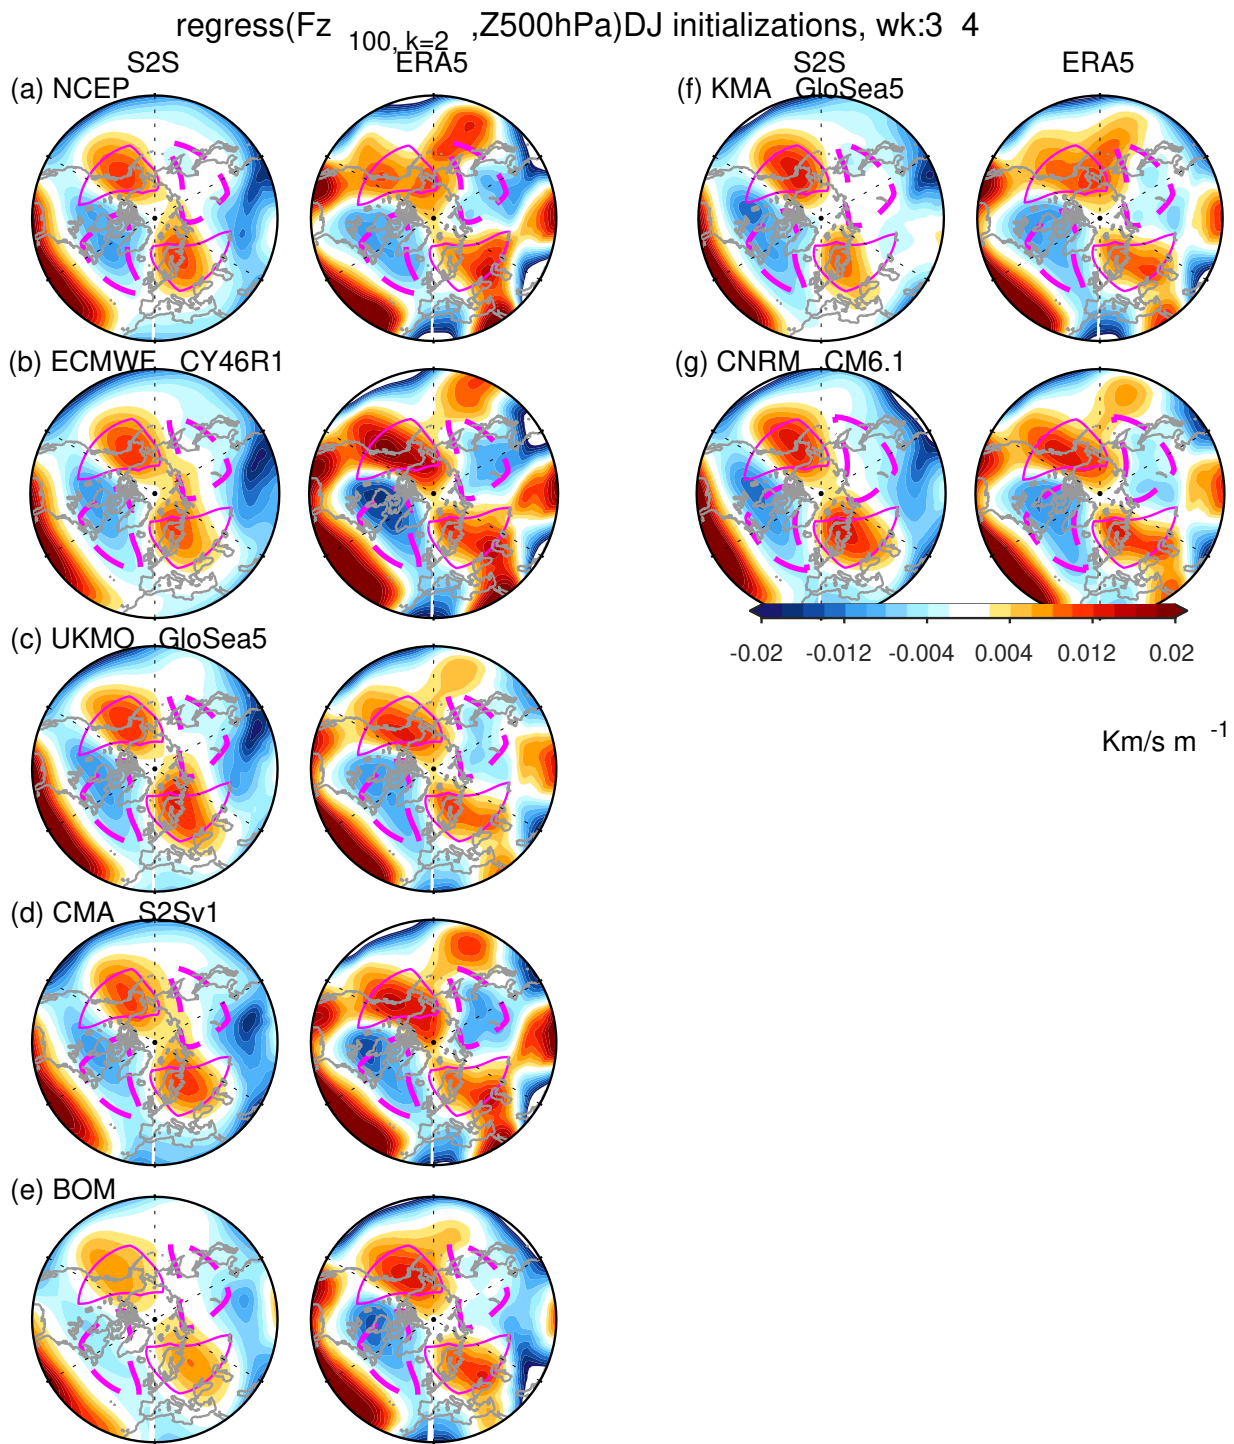

**Figure S1.** As in Figure 6 in the main text but for wave-2

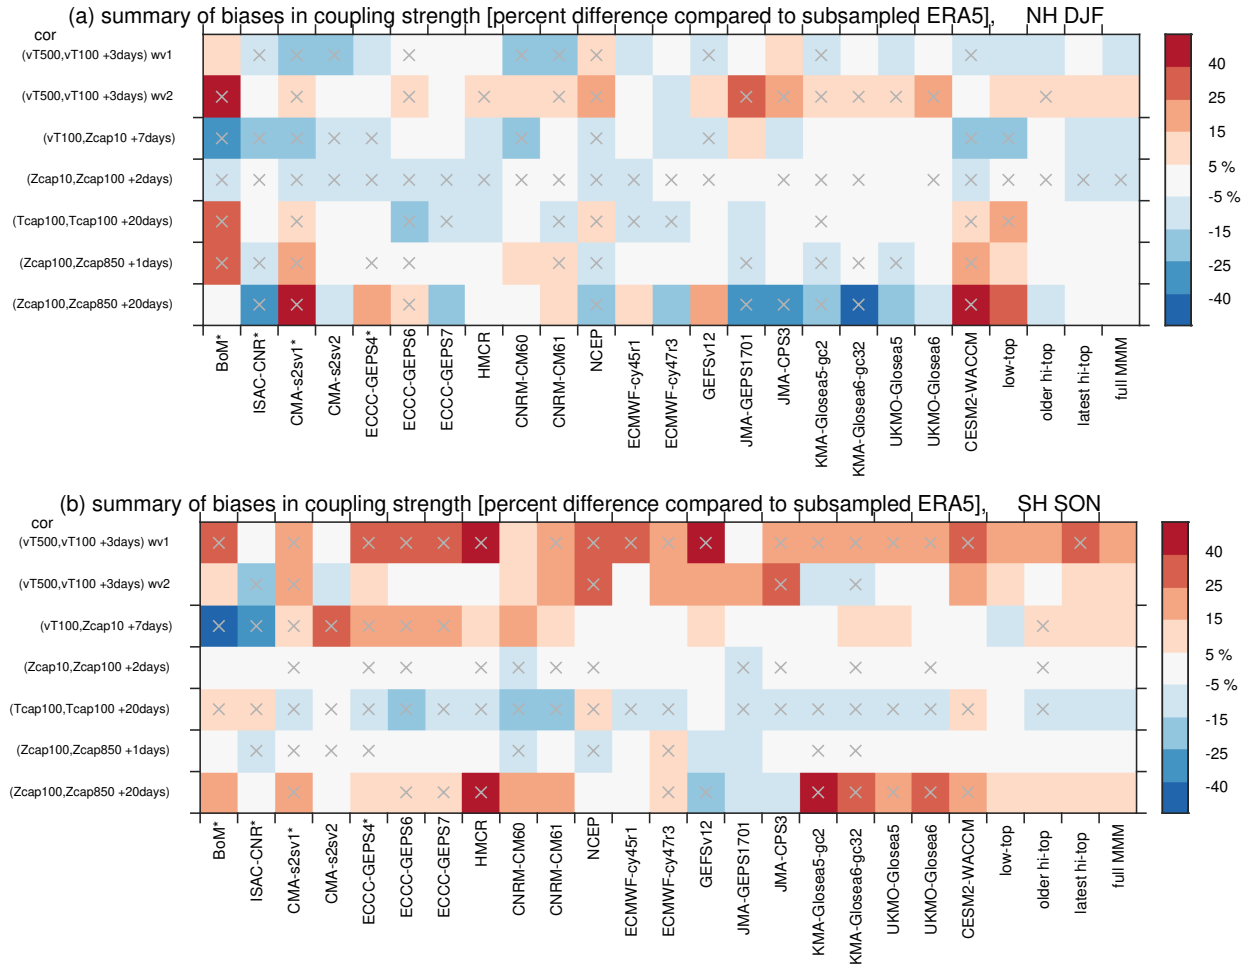

**Figure S2.** As in Figure 3 in the main text but for correlation coefficients.

*Data availability.* The hindcasts from the S2S database used here are available from <https://apps.ecmwf.int/datasets/data/s2s/> under the "Reforecasts" S2S set. The NOAA GEFSv12 hindcasts can be obtained from <https://registry.opendata.aws/noaa-gefs-reforecast/>. Hindcasts for CESM2-CAM are available at [https://www.earthsystemgrid.org/dataset/ucar.cgd.cesm2.s2s\\_hindcasts.html](https://www.earthsystemgrid.org/dataset/ucar.cgd.cesm2.s2s_hindcasts.html), while those for CESM2-WACCM are from [https://www.earthsystemgrid.org/dataset/ucar.cgd.cesm2-wacm.s2s\\_hindcasts.html](https://www.earthsystemgrid.org/dataset/ucar.cgd.cesm2-wacm.s2s_hindcasts.html). Data for the GFDL-SPEAR can be made available upon request.

*Author contributions.* CIG and AHB drafted the paper. CIG produced the final version of all figures exception Figure 9 and 10. ZDL organized and led the SNAP effort leading to this paper, and also downloaded all of the data. AHB produced the final version of Figure 9 and 10. EDS produced an earlier version of Figures 9 and 10. IS and AYK produced an earlier version of Figure 12. GK produced earlier

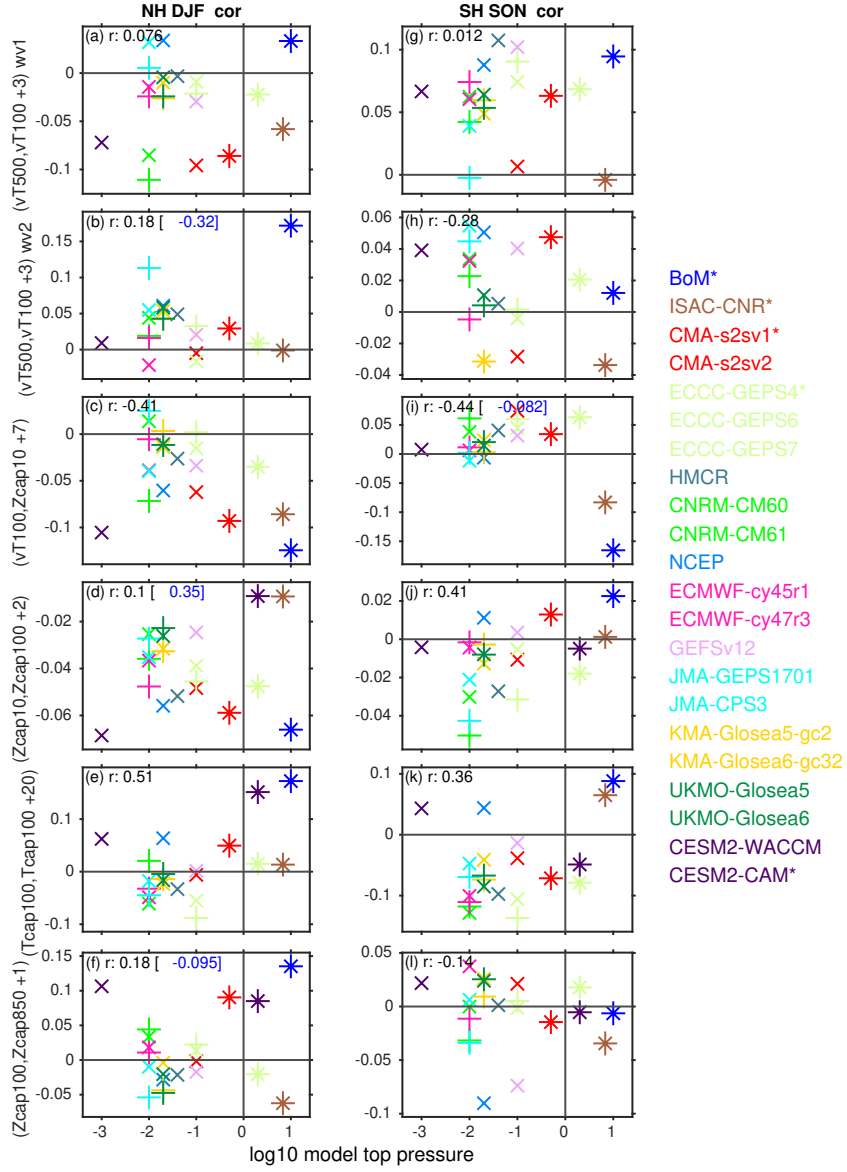

**Figure S3.** As in Figure 4 in the main text but with the coupling strength on the y-axis defined using correlation.

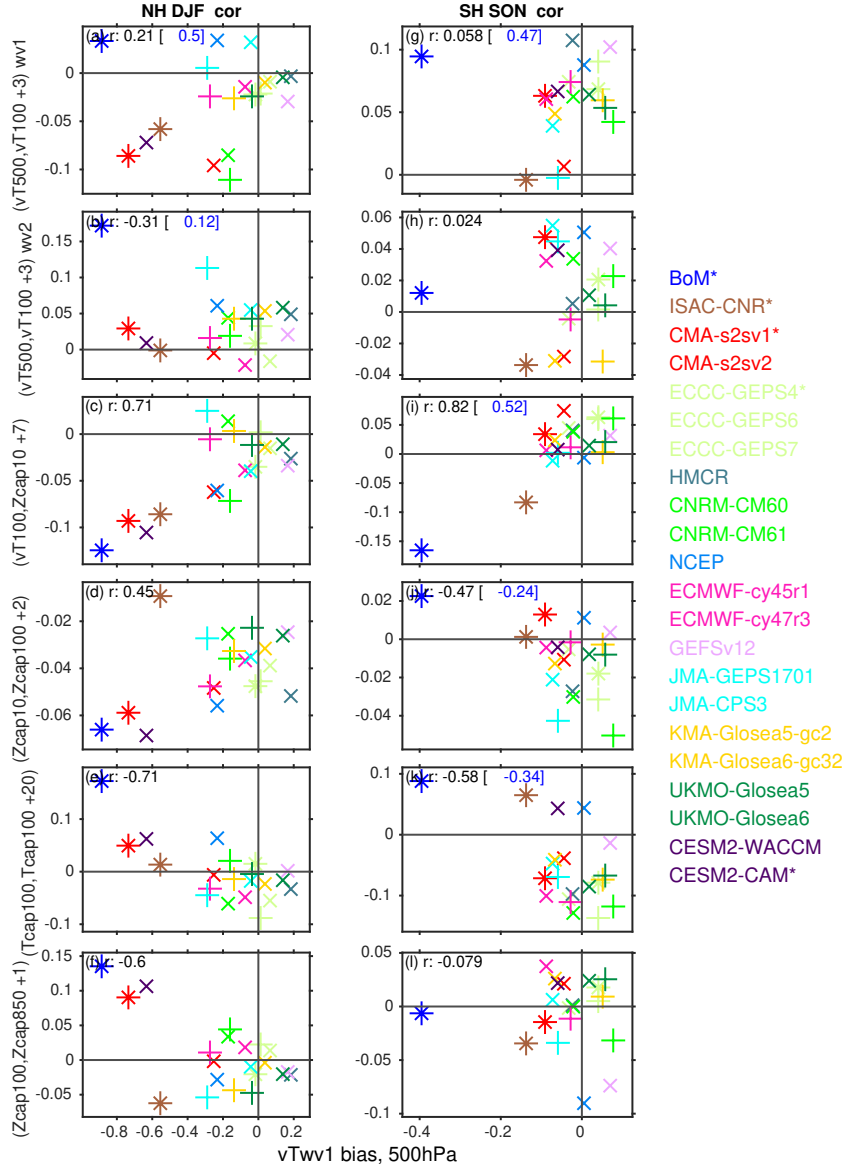

**Figure S4.** As in Figure 5 in the main text but with the coupling strength on the y-axis defined using correlation.

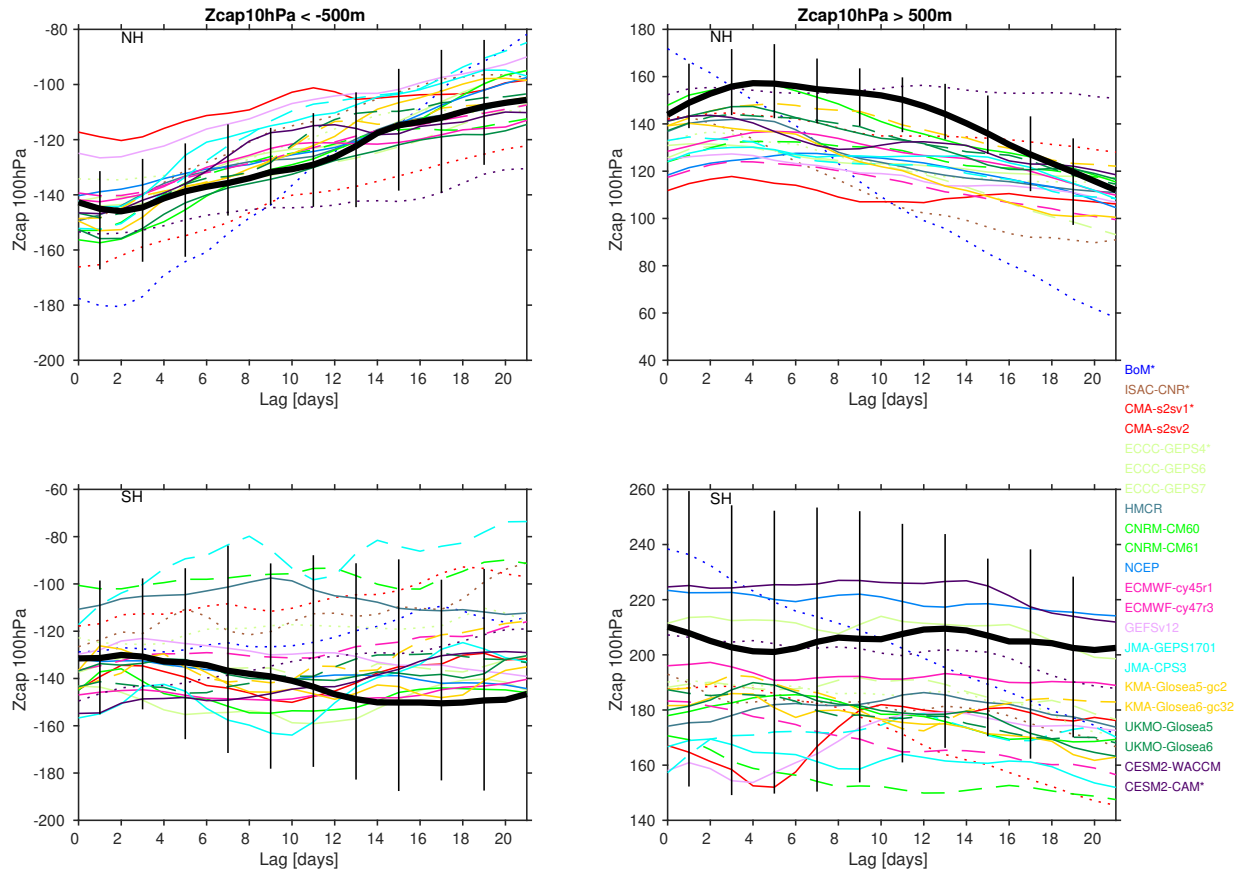

**Figure S5.** As in Figure 11 in the main text, but for a composite based approach of the downward propagation of extreme events within the stratosphere. For each model, we composite initializations in which Zcap at 10hPa in day 10 exceeds 500m or is more negative than -500m. We then analyze the evolution of Zcap at 100hPa from days 10 through 32.

versions of Figures 4 and 5. All the listed coauthors were active participants in this SNAP community effort and provided comments on the draft manuscript.

*Competing interests.* Daniela Domeisen is a member of the editorial board of Weather and Climate Dynamics.

*Acknowledgements.* This work uses S2S Project data. S2S is a joint initiative of the World Weather Research Programme (WWRP) and the World Climate Research Programme (WCRP). This work was initiated by the Stratospheric Network for the Assessment of Predictability (SNAP), a joint activity of SPARC (WCRP) and the S2S Project (WWRP/WCRP).

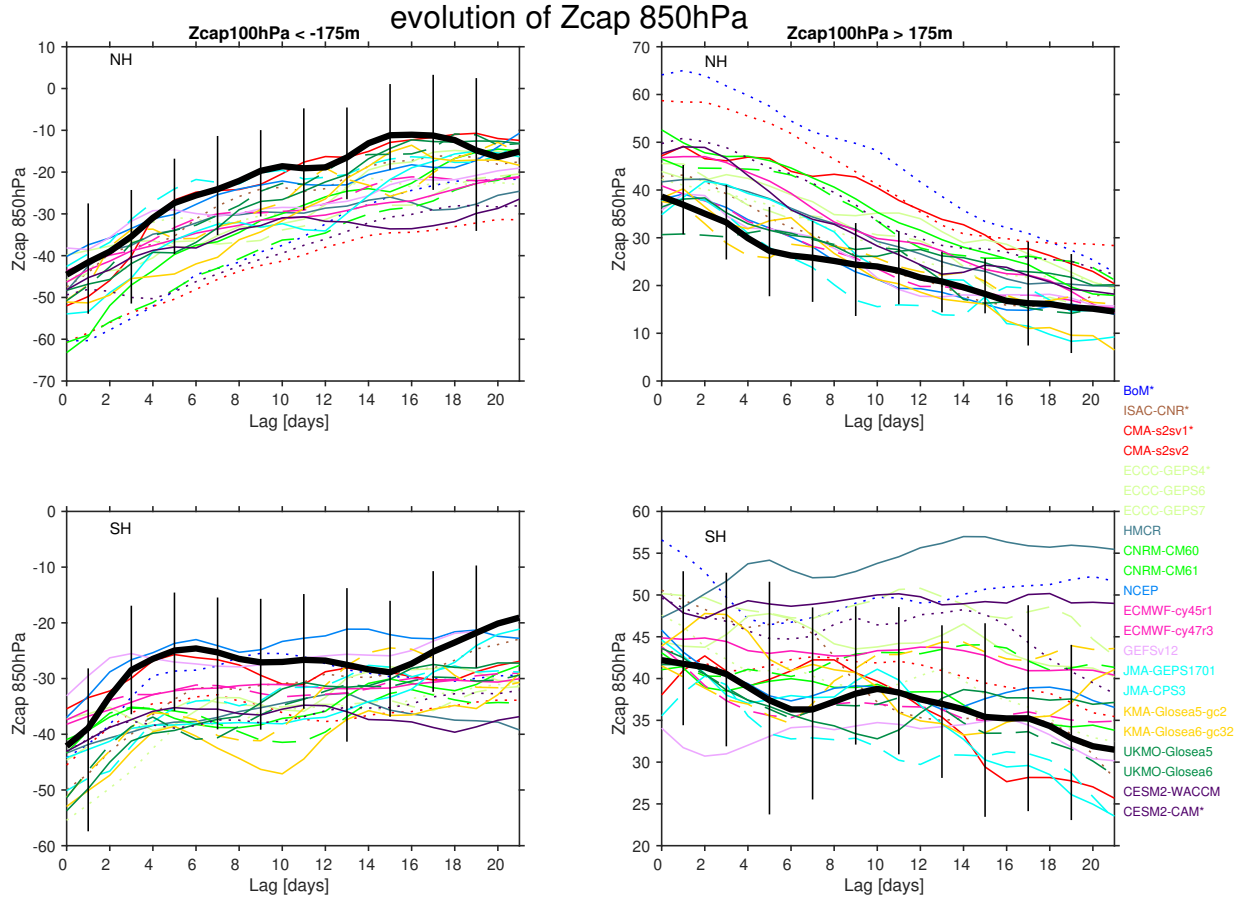

**Figure S6.** As in 12 in the main text, but for a composite based approach of the downward propagation of extreme events from the lower stratosphere to the troposphere. For each model, we composite initializations in which Zcap at 100hPa in day 10 exceeds 175m or is more negative than -175m. We then analyze the evolution of Zcap at 850hPa from days 10 through 32.

- 15 The work of R.W. is funded through ETH grant ETH-05 19-1. Support from the Swiss National Science Foundation through projects PP00P2\_170523 and PP00P2\_198896 to D.D. is gratefully acknowledged. C.I.G. and J.R. are supported by the ISF-NSFC joint research program (ISF grant No. 3065/23 and National Natural Science Foundation of China grant no. ???). C.I.G. and J.C. are supported by the NSF-BSF joint research program 355 (United States-Israel Binational Science Foundation grant no. 2021714 and National Science Foundation grant no. AGS-2140909). The work of M.O. is supported by UBACyT 20020220100075BA, PIP 11220200102038CO and PICT-2021-GRF-TI-00498 projects. The work of A.dI.C. is funded by the Spanish Ministry of Science through project PID2019-109107GB-I00. B.A. and N.C. acknowledge the support of the Spanish Ministry of Science and Innovation through the JeDiS (RTI2018-096402-B-I00) project. FMP and JG-S have been partially supported by the Spanish ATLANTE project (PID2019-110234RB-C21) and “Ramón y Cajal” programme (RYC-2016-21181), respectively. N.P.H. and C.J.W. are supported by UK Natural Environment Research Council (NERC) grant number NE/S00985X/1. C.J.W. is also supported by a Royal Society University Research Fellowship, URF/R/221023. S.-W.S. and H.K. are supported by the National Research Foundation of Korea (NRF) grant funded by the Korean government (MSIT) (2023R1A2C3005607).

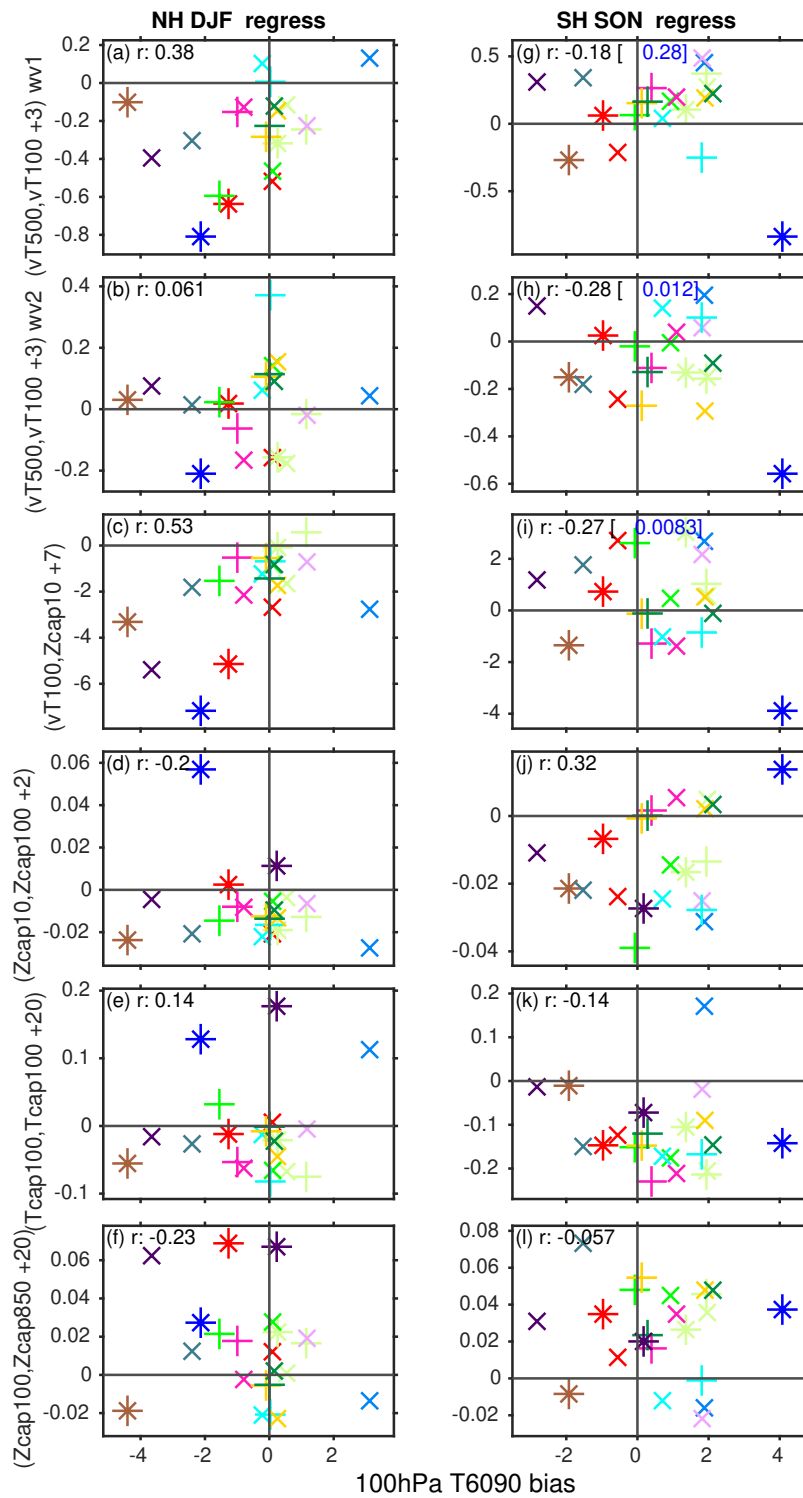

**Figure S7.** As in Figure 4 in the main text, but for 100hPa temperature biases from 60° to the pole on the x-axis.

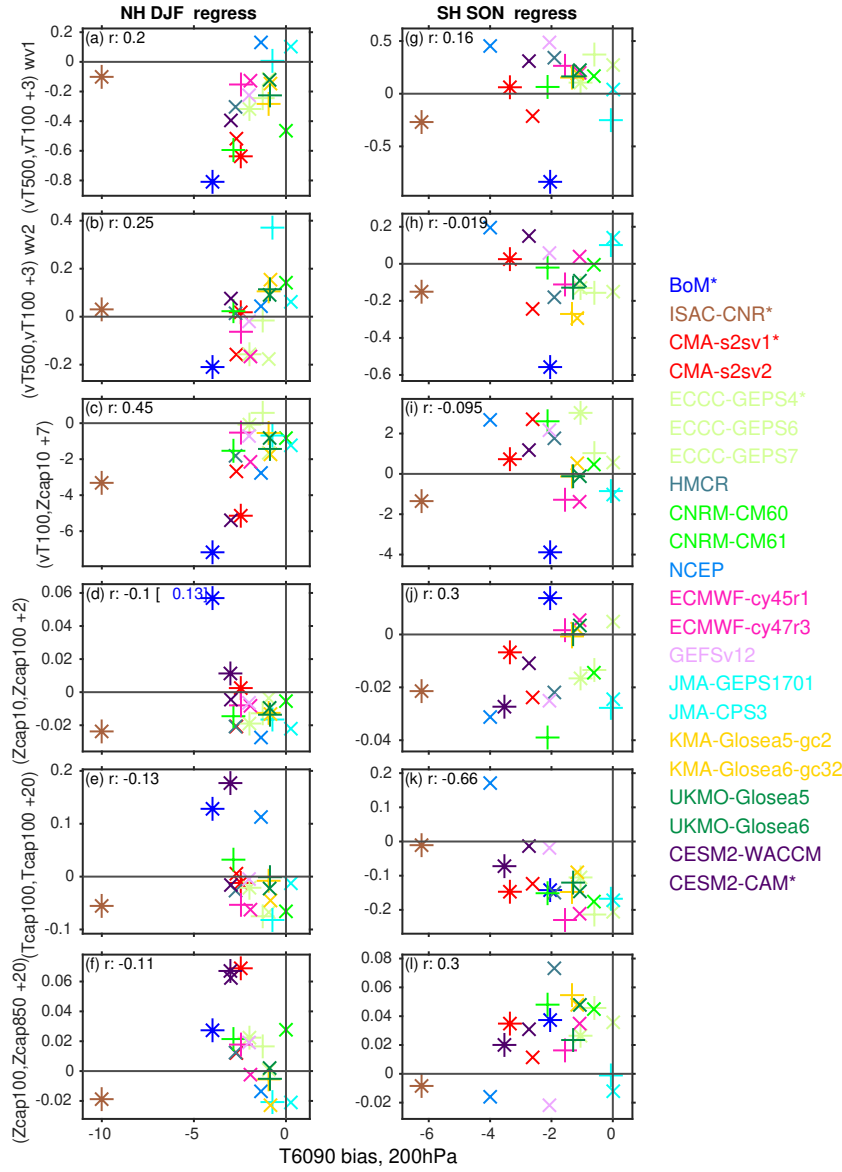

**Figure S8.** As in 4 in the main text, but for 200hPa temperature biases from  $60^\circ$  to the pole on the x-axis.

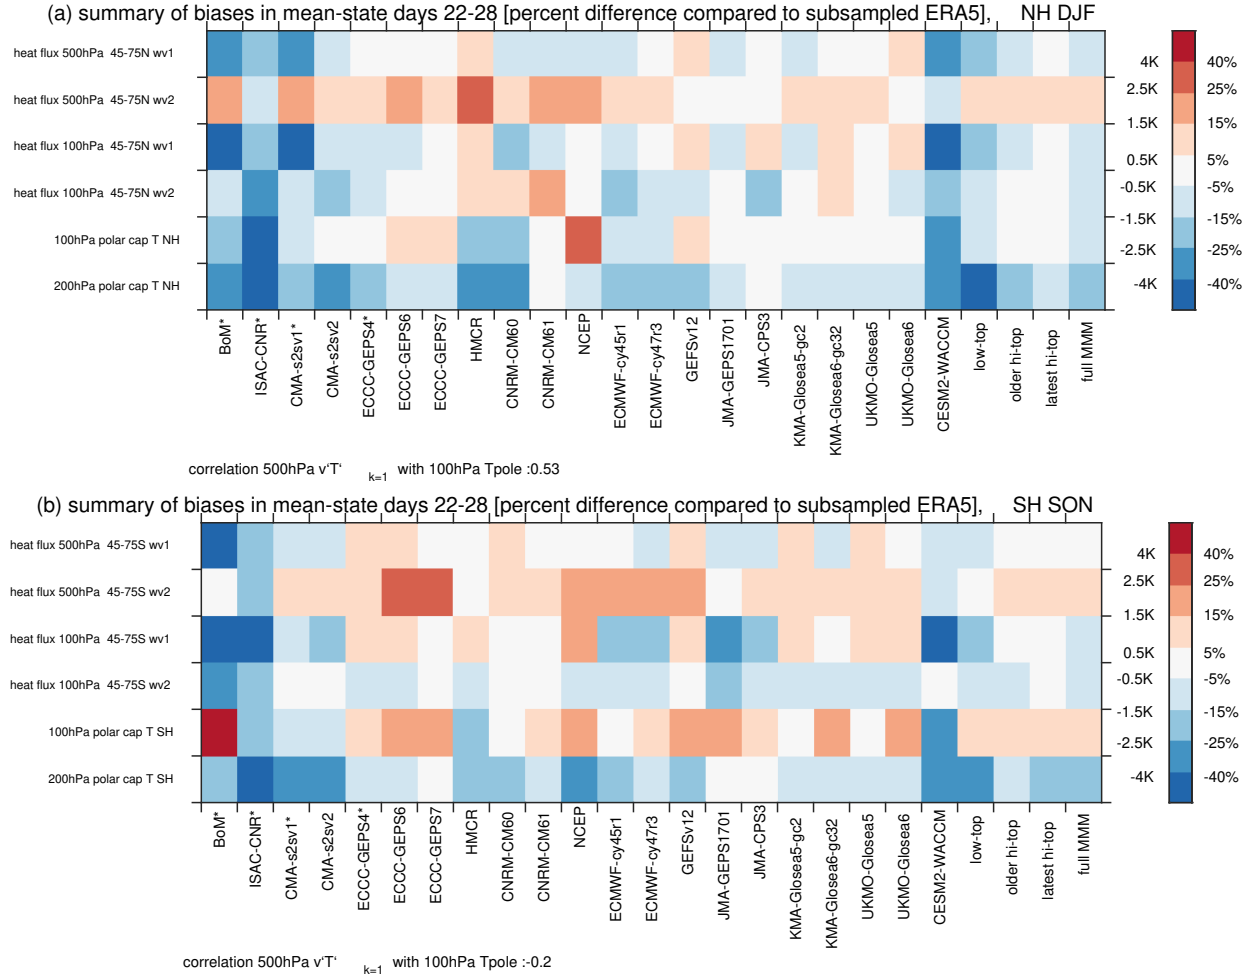

**Figure S9.** Mean bias of the various diagnostics in days 22-28. For each forecast system we compare to the corresponding period in ERA5, and then show the percent error (bias divided by ERA5 mean state) for heat flux and raw biases for temperature.

This material is based upon work supported by the U.S. Department of Energy, Office of Science, Office of Biological & Environmental Research (BER), Regional and Global Model Analysis (RGMA) component of the Earth and Environmental System Modeling Program under Award Number DE-SC0022070 and National Science Foundation (NSF) IA 1947282. This work was also supported by the National Center for Atmospheric Research (NCAR), which is a major facility sponsored by the NSF under Cooperative Agreement No. 1852977.

- 30 P.L. is supported by award NA18OAR4320123 from the National Oceanic and Atmospheric Administration (NOAA), U.S. Department of Commerce. ZDL was partially supported under NOAA Award NA20NWS4680051; ZDL and JP also acknowledge support from US Federally Appropriated Funds. The statements, findings, conclusions, and recommendations are those of the author(s) and do not necessarily reflect the views of NOAA, or the U.S. Department of Commerce.
